# Supplementary material for: Studying the Symbiotic Bacterium Xenorhabdus nematophila in Individual, Living Steinernema carpocapsae Nematodes Using Microfluidic Systems
Source: PubMed Central journal article supplement (PMC5750387; doi:10.1128/msphere.00530-17), 2018-01-03

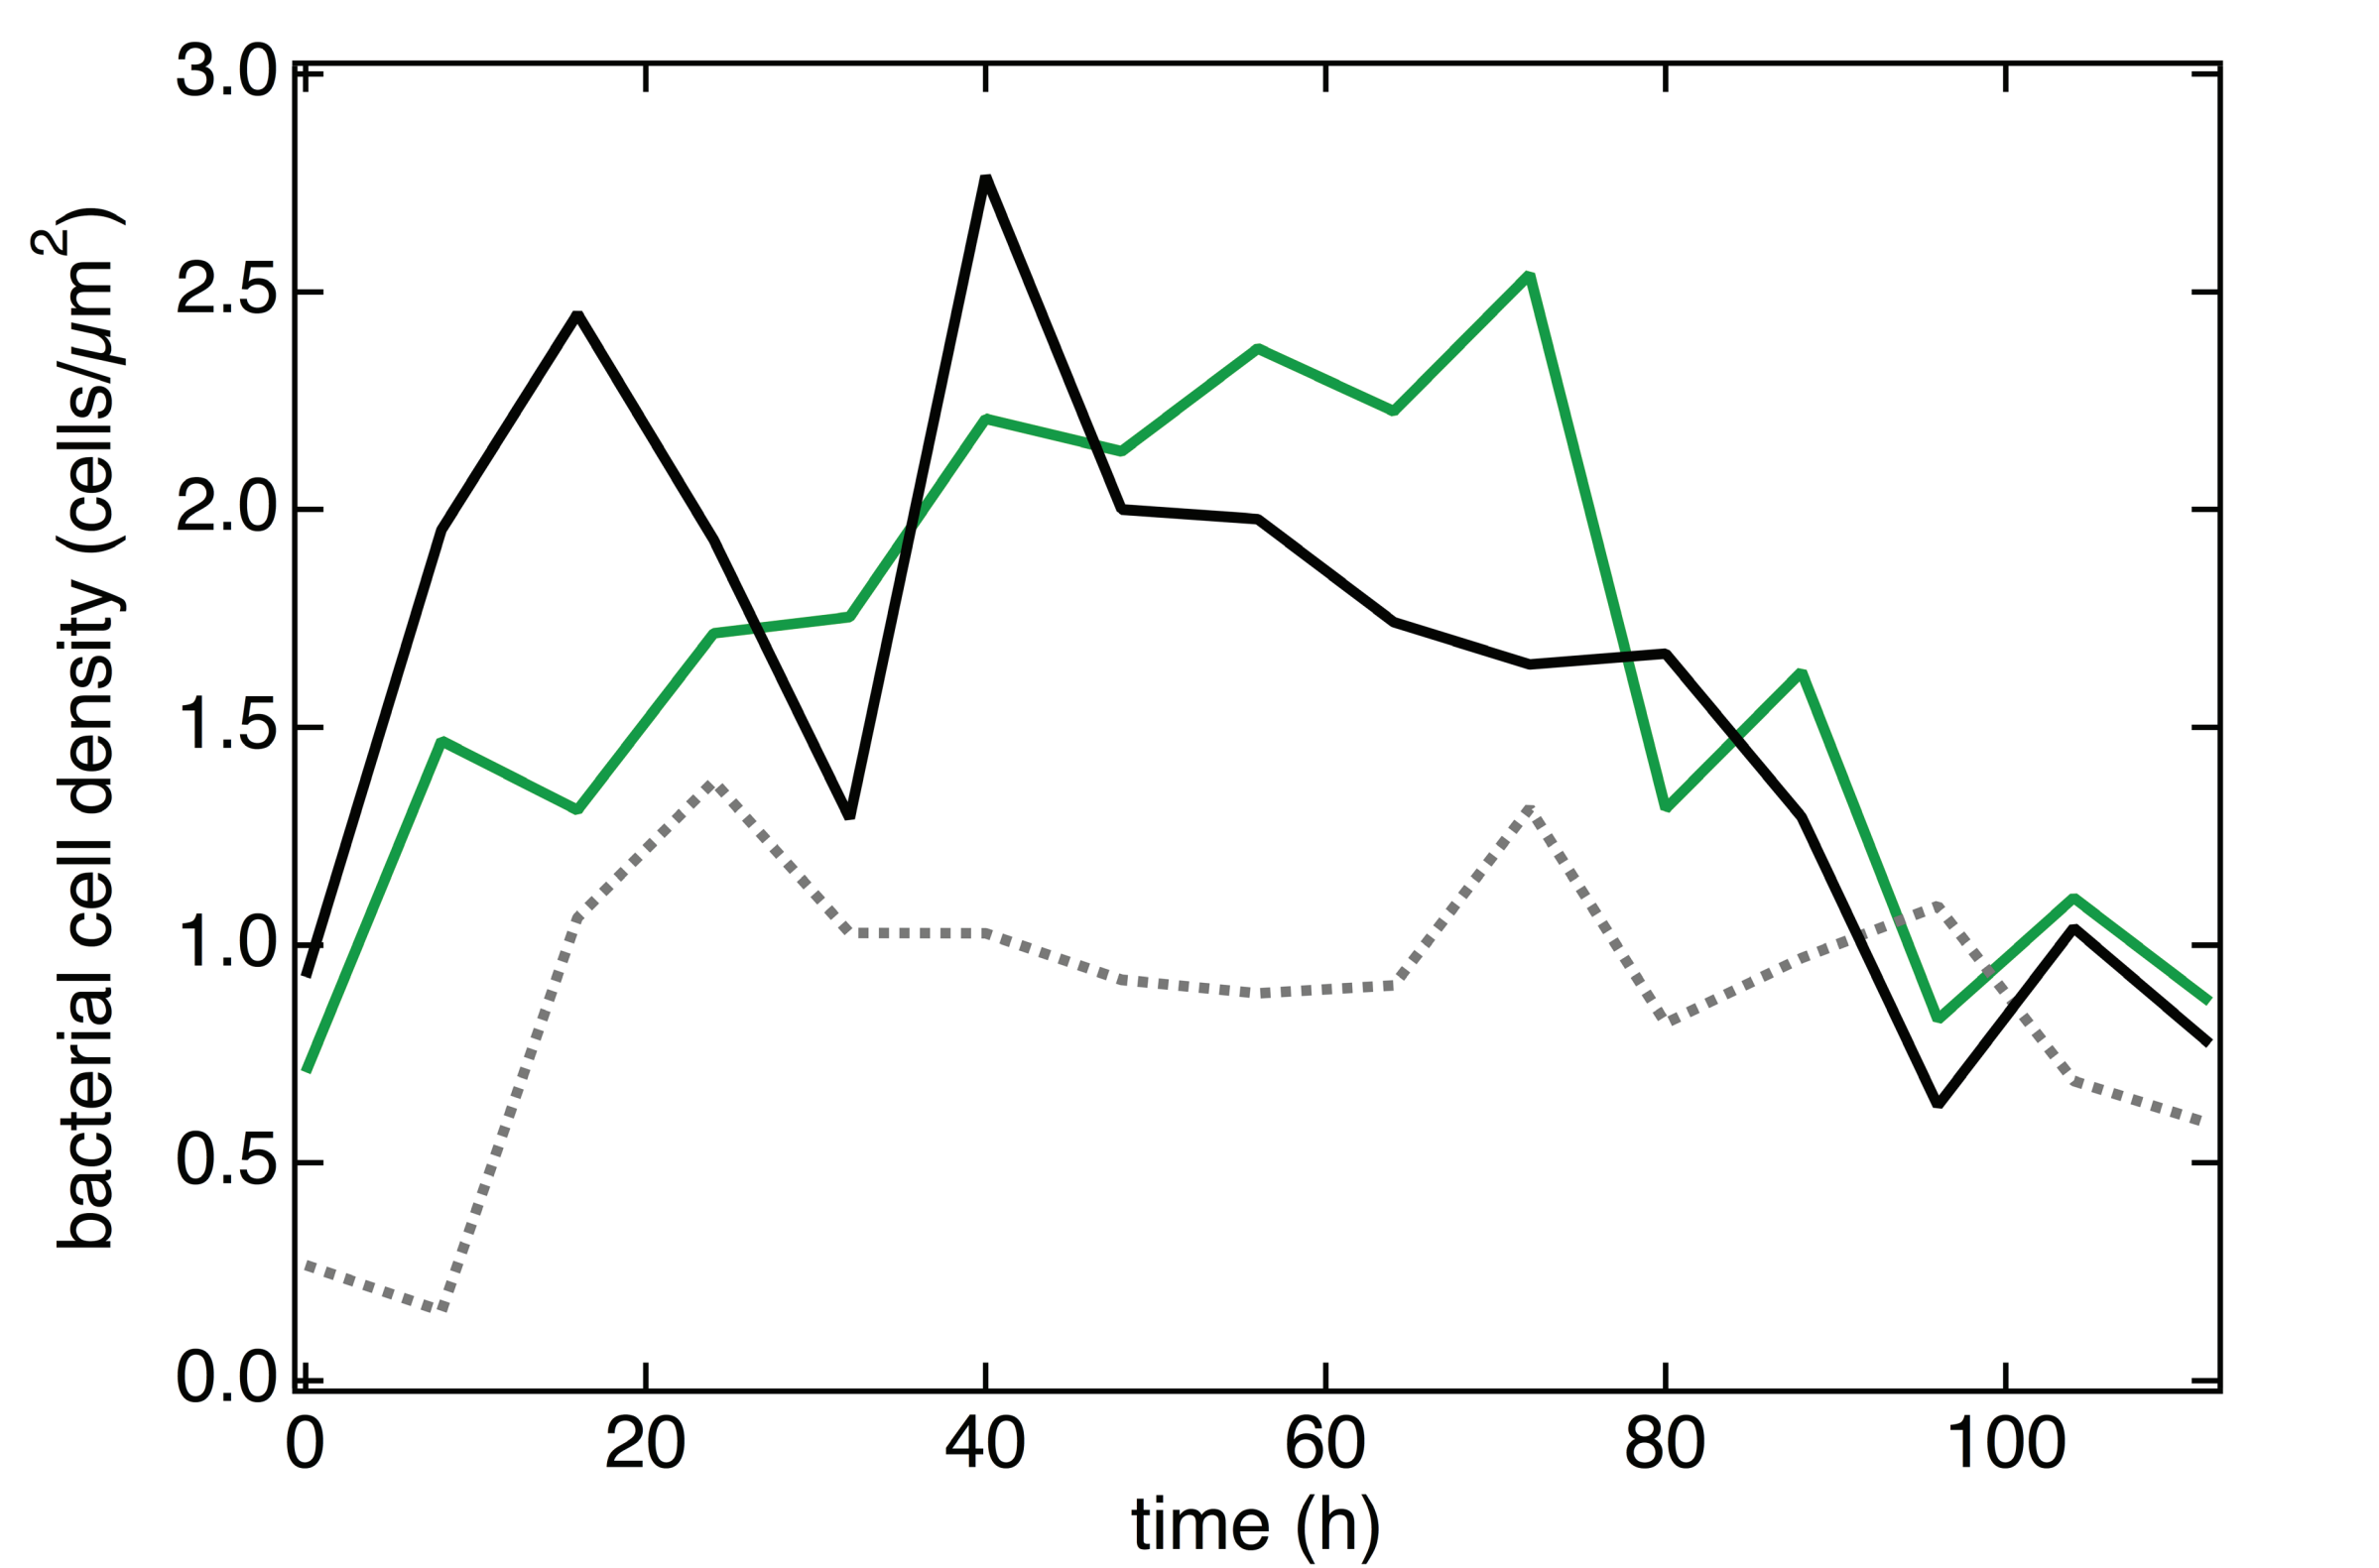

Supplement: sph001182439sf4.pdf [file sph001182439sf4.pdf]
