# Supplementary material for: Studying the Symbiotic Bacterium Xenorhabdus nematophila in Individual, Living Steinernema carpocapsae Nematodes Using Microfluidic Systems
Source: PubMed Central journal article supplement (PMC5750387; doi:10.1128/msphere.00530-17), 2018-01-03
Supplement: sph001182439st1.pdf [file sph001182439st1.pdf]

**Table S1. Parameter values in design of microfluidic devices**

| Parameter <sup>a</sup> | Description      | Epifluorescence <sup>b</sup> |         | Confocal <sup>c</sup> |         |         |         |
|------------------------|------------------|------------------------------|---------|-----------------------|---------|---------|---------|
|                        |                  | E1 (μm)                      | E2 (μm) | C1 (μm)               | C2 (μm) | C3 (μm) | C4 (μm) |
| $\alpha$               | Entrance radius  | 75                           | 75      | 75                    | 75      | 75      | 75      |
| $\beta$                | Connection (w/L) | 15/200                       | 10/200  | 10/200                | 10/200  | 10/200  | 15/200  |
| $\gamma$               | Trap (w/L)       | 25/600                       | 25/600  | 25/600                | 10/600  | 15/600  | 20/600  |

<sup>a</sup>Various combinations of parameter  $\alpha$ ,  $\beta$ , and  $\gamma$  values (see Fig. 2C for details) are used for designs of microfluidic devices to fit various sizes of nematodes in either epifluorescence microscopy or confocal microscopy experiments. Parameter  $\alpha$  = radius of the circular arc used for the nematode trap entrance; Parameter  $\beta$  = dimensions of the connection between trap entrance and trap (shown in width/length); Parameter  $\gamma$  = dimension of the trap (shown in width/length).

<sup>b</sup>The combination of parameter values used for the device designs in epifluorescence microscopy experiments (E1= epifluorescence design 1 and E2= epifluorescence design 2) are listed.

<sup>c</sup>The combination of parameter values used for the device designs in confocal microscopy experiments (C1-C4= Confocal design 1-4) are listed.
