# Supplementary material for: Studying the Symbiotic Bacterium Xenorhabdus nematophila in Individual, Living Steinernema carpocapsae Nematodes Using Microfluidic Systems
Source: PubMed Central journal article supplement (PMC5750387; doi:10.1128/msphere.00530-17), 2018-01-03
Supplement: sph001182439st2.pdf [file sph001182439st2.pdf]

**Table S2. Growth rate measurements of *X. nematophila* in individual nematodes**

| Experiment Number | Maximum Growth Rate (doublings/h) | Average Growth Rate (doublings/h) (mean $\pm$ st. dev.) |
|-------------------|-----------------------------------|---------------------------------------------------------|
| 1                 | 0.21                              | 0.015 $\pm$ 0.081                                       |
| 1                 | 0.22                              | 0.0098 $\pm$ 0.090                                      |
| 1                 | 0.32                              | 0.031 $\pm$ 0.13                                        |
| 1                 | 0.24                              | 0.019 $\pm$ 0.11                                        |
| 1                 | 0.20                              | 0.018 $\pm$ 0.091                                       |
| 1                 | 0.18                              | 0.039 $\pm$ 0.078                                       |
| 1                 | 0.34                              | 0.035 $\pm$ 0.11                                        |
| 1                 | 0.16                              | 0.018 $\pm$ 0.087                                       |
| 1                 | 0.14                              | -0.0019 $\pm$ 0.1                                       |
| 1                 | 0.2                               | 0.023 $\pm$ 0.090                                       |
| 1                 | 0.17                              | 0.0087 $\pm$ 0.097                                      |
| 1                 | 0.21                              | 0.011 $\pm$ 0.092                                       |
| 1                 | 0.42                              | 0.015 $\pm$ 0.15                                        |
| 1                 | 0.29                              | 0.0073 $\pm$ 0.18                                       |
| 1                 | 0.11                              | 0.020 $\pm$ 0.047                                       |
| 1                 | 0.17                              | 0.019 $\pm$ 0.081                                       |
| 1                 | 0.33                              | 0.050 $\pm$ 0.12                                        |
| 1                 | 0.21                              | 0.031 $\pm$ 0.069                                       |
| 1                 | 0.15                              | -0.059 $\pm$ 0.21                                       |
| 1                 | 0.37                              | 0.036 $\pm$ 0.13                                        |
| 2                 | 0.014                             | 0.0021 $\pm$ 0.013                                      |
| 2                 | 0.10                              | 0.052 $\pm$ 0.075                                       |
| 2                 | 0.096                             | 0.016 $\pm$ 0.041                                       |
| 2                 | 0.078                             | 0.0024 $\pm$ 0.037                                      |
| 2                 | 0.14                              | 0.0018 $\pm$ 0.083                                      |
| 2                 | 0.22                              | 0.12 $\pm$ 0.086                                        |
| 2                 | 0.079                             | 0.00064 $\pm$ 0.046                                     |
| 2                 | 0.21                              | 0.13 $\pm$ 0.11                                         |
| 2                 | 0.054                             | -0.0064 $\pm$ 0.036                                     |
| 2                 | 0.13                              | 0.086 $\pm$ 0.056                                       |
| 2                 | 0.11                              | 0.0060 $\pm$ 0.057                                      |
| 2                 | 0.17                              | 0.016 $\pm$ 0.053                                       |
| 2                 | 0.042                             | 0.0055 $\pm$ 0.031                                      |
| 2                 | 0.15                              | 0.020 $\pm$ 0.069                                       |
| 2                 | 0.10                              | -0.023 $\pm$ 0.059                                      |
| 2                 | 0.24                              | 0.020 $\pm$ 0.15                                        |
| 2                 | 0.10                              | 0.037 $\pm$ 0.050                                       |
| 2                 | 0.092                             | 0.023 $\pm$ 0.057                                       |
| 2                 | 0.13                              | -0.01 $\pm$ 0.065                                       |
| 2                 | 0.11                              | -0.0098 $\pm$ 0.072                                     |
| 2                 | 0.45                              | -0.015 $\pm$ 0.22                                       |
| 3                 | 0.18                              | 0.0058 $\pm$ 0.10                                       |
| 3                 | 0.18                              | 0.0098 $\pm$ 0.074                                      |
| 3                 | 0.065                             | -0.0033 $\pm$ 0.033                                     |

|   |       |                       |
|---|-------|-----------------------|
| 3 | 0.081 | $-0.0029 \pm 0.048$   |
| 3 | 0.28  | $0.010 \pm 0.11$      |
| 3 | 0.077 | $0.0051 \pm 0.048$    |
| 3 | 0.044 | $-0.042 \pm 0.069$    |
| 3 | 0.10  | $-0.022 \pm 0.12$     |
| 3 | 0.054 | $-0.035 \pm 0.051$    |
| 3 | 0.13  | $0.0011 \pm 0.080$    |
| 3 | 0.059 | $-0.013 \pm 0.046$    |
| 3 | 0.14  | $0.018 \pm 0.049$     |
| 3 | 0.13  | $0.012 \pm 0.062$     |
| 3 | 0.061 | $0.0027 \pm 0.036$    |
| 3 | 0.078 | $-0.000023 \pm 0.044$ |
| 3 | 0.11  | $0.027 \pm 0.048$     |
